# Supplementary material
Source: PubMed Central journal article supplement (PMC4134954)
Supplement: NIHMS603302-supplement-01.pdf [file NIHMS603302-supplement-01.pdf]

| Transcript  | Sense Primer                                | Antisense Primer                             | 1° amplicon (bp) |
|-------------|---------------------------------------------|----------------------------------------------|------------------|
| Blcap       | ATTAACCCTCACTAAAGGGAGCCCGGCAGAGATCATGT      | TAATACGACTCACTATAGGGGTTCCAGGAGGAAGCTGAGC     | 172              |
| Cadps       | ATTAACCCTCACTAAAGGGATTCTCAGGATGTCCTTCGTGATA | TAATACGACTCACTATAGGGTCAGCCACGTGCAGATGATG     | 144              |
| Cyfp2       | ATTAACCCTCACTAAAGGGAGACATGCAGATAGAGCTGGCC   | TAATACGACTCACTATAGGGTGCTCACAGATGTTGTACTGGG   | 156              |
| Flna        | ATTAACCCTCACTAAAGGGACGCCGCTTACTGTTTCTAG     | TAATACGACTCACTATAGGGCTGTGACATAGCACTCCTCCAG   | 188              |
| Gabra3      | ATTAACCCTCACTAAAGGGACGGCCATGGACTGGTTCAT     | TAATACGACTCACTATAGGGCTTTGTTGGAGCTGCTGGTG     | 204              |
| Gria2 (Q/R) | ATTAACCCTCACTAAAGGGAATAGTCTCTGGTTTTCTTGGG   | TAATACGACTCACTATAGGGATGATGAGGGTAAAGAACCACC   | 152              |
| Gria2 (R/G) | ATTAACCCTCACTAAAGGGACCACACCTAAAGGATCCTCATT  | TAATACGACTCACTATAGGGCTGAGGGCACTGGTCTTTTC     | 200              |
| Gria4       | ATTAACCCTCACTAAAGGGACGACGCCAAGGGTTCC        | TAATACGACTCACTATAGGGCTCAAGGCACTCGTCTTGTCC    | 200              |
| Grik1       | ATTAACCCTCACTAAAGGGATTCTGGTTTGGCGTTGGAG     | TAATACGACTCACTATAGGGGATGATTAGGGTGAAAAACCAC   | 148              |
| Grik2       | ATTAACCCTCACTAAAGGGATTCTGGTTTGGAGTTGGAGCT   | TAATACGACTCACTATAGGGGATGATAAGTGTGAAAAACCACCA | 148              |
| Htr2c       | ATTAACCCTCACTAAAGGGAGCTGGACCGTATGTAGCA      | TAATACGACTCACTATAGGGGATACGAACCTGAAACTCCTATTG | 196              |
| Igfbp7      | ATTAACCCTCACTAAAGGGAGTGAAGAGCCGCAAGAGG      | TAATACGACTCACTATAGGGCGCAGCTGGCAGCCG          | 180              |
| Kcna1       | ATTAACCCTCACTAAAGGGATGTGTGCCATCGCTGGTG      | TAATACGACTCACTATAGGGGAGGTCCTGTGAGAGGCTAAGT   | 192              |

T3 promoter

T7 promoter

**Supplementary Table 1. Substrate-specific oligonucleotide primers for RT-PCR amplification of ADAR targets.** The sequence of sense and antisense oligonucleotide primers for target-specific RT-PCR amplification of the edited region in ADAR substrates is presented with the expected sizes (base pairs, bp) of the corresponding PCR amplicons; all primers are presented in the 5'-to-3' orientation. The positions of the adapter sequences corresponding to the T3 and T7 RNA polymerase promoters are indicated for sense and antisense primers, respectively.

AATGATACGGCGACCACCGAGATCTACACTCTTTCCCTACACGACGCTCTTCCGATCT**AACCAT**ATTAACCCTCACTAAAGGGA  
 AATGATACGGCGACCACCGAGATCTACACTCTTTCCCTACACGACGCTCTTCCGATCT**AACGTC**ATTAACCCTCACTAAAGGGA  
 AATGATACGGCGACCACCGAGATCTACACTCTTTCCCTACACGACGCTCTTCCGATCT**AACCTCA**ATTAACCCTCACTAAAGGGA  
 AATGATACGGCGACCACCGAGATCTACACTCTTTCCCTACACGACGCTCTTCCGATCT**AAGACT**ATTAACCCTCACTAAAGGGA  
 AATGATACGGCGACCACCGAGATCTACACTCTTTCCCTACACGACGCTCTTCCGATCT**ACTATT**ATTAACCCTCACTAAAGGGA  
 AATGATACGGCGACCACCGAGATCTACACTCTTTCCCTACACGACGCTCTTCCGATCT**AGATAC**ATTAACCCTCACTAAAGGGA  
 AATGATACGGCGACCACCGAGATCTACACTCTTTCCCTACACGACGCTCTTCCGATCT**AGGCGG**ATTAACCCTCACTAAAGGGA  
 AATGATACGGCGACCACCGAGATCTACACTCTTTCCCTACACGACGCTCTTCCGATCT**ATATGA**ATTAACCCTCACTAAAGGGA  
 AATGATACGGCGACCACCGAGATCTACACTCTTTCCCTACACGACGCTCTTCCGATCT**CAATAT**ATTAACCCTCACTAAAGGGA  
 AATGATACGGCGACCACCGAGATCTACACTCTTTCCCTACACGACGCTCTTCCGATCT**CCTCGG**ATTAACCCTCACTAAAGGGA  
 AATGATACGGCGACCACCGAGATCTACACTCTTTCCCTACACGACGCTCTTCCGATCT**CGCTTC**ATTAACCCTCACTAAAGGGA  
 AATGATACGGCGACCACCGAGATCTACACTCTTTCCCTACACGACGCTCTTCCGATCT**CGTCTT**ATTAACCCTCACTAAAGGGA  
 AATGATACGGCGACCACCGAGATCTACACTCTTTCCCTACACGACGCTCTTCCGATCT**CTGCAT**ATTAACCCTCACTAAAGGGA  
 AATGATACGGCGACCACCGAGATCTACACTCTTTCCCTACACGACGCTCTTCCGATCT**GCAGAA**ATTAACCCTCACTAAAGGGA  
 AATGATACGGCGACCACCGAGATCTACACTCTTTCCCTACACGACGCTCTTCCGATCT**GCAGTG**ATTAACCCTCACTAAAGGGA  
 AATGATACGGCGACCACCGAGATCTACACTCTTTCCCTACACGACGCTCTTCCGATCT**GCGTCC**ATTAACCCTCACTAAAGGGA  
 AATGATACGGCGACCACCGAGATCTACACTCTTTCCCTACACGACGCTCTTCCGATCT**GGAGTC**ATTAACCCTCACTAAAGGGA  
 AATGATACGGCGACCACCGAGATCTACACTCTTTCCCTACACGACGCTCTTCCGATCT**GGTAGG**ATTAACCCTCACTAAAGGGA  
 AATGATACGGCGACCACCGAGATCTACACTCTTTCCCTACACGACGCTCTTCCGATCT**GTTAAT**ATTAACCCTCACTAAAGGGA  
 AATGATACGGCGACCACCGAGATCTACACTCTTTCCCTACACGACGCTCTTCCGATCT**GTTGCC**ATTAACCCTCACTAAAGGGA  
 AATGATACGGCGACCACCGAGATCTACACTCTTTCCCTACACGACGCTCTTCCGATCT**TACGGG**ATTAACCCTCACTAAAGGGA  
 AATGATACGGCGACCACCGAGATCTACACTCTTTCCCTACACGACGCTCTTCCGATCT**TCAGCC**ATTAACCCTCACTAAAGGGA  
 AATGATACGGCGACCACCGAGATCTACACTCTTTCCCTACACGACGCTCTTCCGATCT**TTCGGC**ATTAACCCTCACTAAAGGGA  
 AATGATACGGCGACCACCGAGATCTACACTCTTTCCCTACACGACGCTCTTCCGATCT**TTGACC**ATTAACCCTCACTAAAGGGA

Adapter A

T3 promoter

CAAGCAGAAGACGGCATACGAGCTCTTCCGATCTTAATACGACTCACTATAGGG

Adapter B

T7 promoter

**Supplementary Table 2. Universal primers for multiplex high-throughput sequencing of ADAR substrates.** The sequences of universal oligonucleotide primers for PCR amplification of T3 and T7 RNA polymerase promoter-tagged RT-PCR products (*see Supplemental Table 1*) are shown in the 5'-to-3' orientation. The positions of the adapter sequences necessary for single-end sequencing on the Illumina platform and the regions corresponding to the T3 and T7 RNA polymerase promoters are shown, as well as unique 6 nt barcodes (*shaded region*) allowing multiplex analysis of editing profiles.

## # reads

| Transcript   | Editing site  | Cortex         |                | Hippocampus     |                | Cerebellum     |                |
|--------------|---------------|----------------|----------------|-----------------|----------------|----------------|----------------|
|              |               | PBS            | reovirus       | PBS             | reovirus       | PBS            | reovirus       |
| Bicap        | Y/C, Q/R, K/R | 417139 ± 32047 | 233664 ± 43956 | 630866 ± 65297  | 331906 ± 56514 | 784195 ± 34691 | 486031 ± 20920 |
| Cadps        | E/G           | 71999 ± 39765  | 668524 ± 58414 | 812813 ± 62407  | 741918 ± 8672  | 674482 ± 16528 | 627556 ± 42837 |
| Cyfp2        | K/E           | 296973 ± 10857 | 340403 ± 18242 | 401207 ± 28692  | 338967 ± 15362 | 356857 ± 6325  | 369017 ± 22793 |
| Flna         | Q/R           | 253895 ± 6262  | 593520 ± 66178 | 547222 ± 61181  | 473303 ± 25432 | 484645 ± 51800 | 511340 ± 45452 |
| Gabra3       | I/M           | 171768 ± 14151 | 220496 ± 18752 | 108851 ± 9936   | 91993 ± 8176   | 63069 ± 6101   | 40662 ± 3831   |
| Gria2        | Q/R           | 418136 ± 17146 | 457867 ± 50084 | 578149 ± 32982  | 403210 ± 9314  | 521658 ± 16549 | 475000 ± 39488 |
| Gria2 (flip) | R/G           | 111561 ± 4161  | 112579 ± 17357 | 122476 ± 10217  | 101648 ± 7441  | 33362 ± 2439   | 21188 ± 2573   |
| Gria2 (flop) | R/G           | 49530 ± 1760   | 45955 ± 7544   | 94121 ± 7929    | 75386 ± 5596   | 112448 ± 5192  | 69827 ± 9948   |
| Gria4 (flip) | R/G           | 55609 ± 3294   | 78590 ± 15363  | 123129 ± 12164  | 75709 ± 10431  | 728331 ± 16624 | 326049 ± 33328 |
| Gria4 (flop) | R/G           | 96908 ± 5051   | 102122 ± 20607 | 264250 ± 26793  | 158433 ± 18555 | 349008 ± 10433 | 219839 ± 36725 |
| Grik1        | Q/R           | 62826 ± 3687   | 58386 ± 10100  | 80753 ± 13298   | 69865 ± 8429   | 167811 ± 15162 | 102858 ± 11980 |
| Grik2        | Q/R           | 49269 ± 2368   | 37936 ± 6509   | 68833 ± 10204   | 56935 ± 6614   | 185029 ± 5514  | 158169 ± 20817 |
| Htr2c        | A, B, E, C, D | 368679 ± 31704 | 432487 ± 95001 | 999864 ± 114964 | 510826 ± 18697 | 519467 ± 64137 | 189939 ± 29457 |
| Igfbp7       | R/G           | 229014 ± 30471 | 159127 ± 7682  | 301641 ± 16071  | 376504 ± 15691 | 352346 ± 11765 | 297454 ± 21709 |
| Kcna1        | I/V           | 178874 ± 9443  | 251983 ± 42414 | 208942 ± 30373  | 244569 ± 23553 | 374929 ± 46206 | 573854 ± 47129 |

**Supplementary Table 3. Deep-sequencing reads.** For quantitative analysis of RNA editing patterns (Table 1), the total number of multiplexed sequence-specific reads (Means ± SEM; n = 4 animals/treatment group) in dissected brain regions is shown for control and reovirus-infected mice.

| Transcript   | Editing Site  | Bar-code    | T3 primer                                                     | Reference sequence                              |
|--------------|---------------|-------------|---------------------------------------------------------------|-------------------------------------------------|
| Blcap        | Y/C; Q/R      | NNNNNN      | ATTAACCCTCACTAAAGGGA                                          | GCCCGGCAGAGATCATGTRTTGCCTCCRGTGGCTGCTGCCCGTCCT  |
|              | K/R           | CCTCATCCCCA | RGCCCTCAACCCCGCTCTGTGGTTCAGCCACTCCATGTTTCATGGGCTTCTACCTGCTCAG |                                                 |
| Cadps        | E/G           | NNNNNN      | ATTAACCCTCACTAAAGGGA                                          | TTCTCAGGATGTCCTTCGTGATAAGGTCAATGRGGAGATGTATATA  |
| Cyfp2        | K/E           | NNNNNN      | ATTAACCCTCACTAAAGGGA                                          | GACATGCAGATAGAGCTGGCCAGATACATTRAGACCAGTGCTCACT  |
| Flna         | Q/R           | NNNNNN      | ATTAACCCTCACTAAAGGGA                                          | CGCCGCCTTACTGTTTCTAGTCTTCRGGAGTCAGGGTTAAAGGTCA  |
| Gabra3       | I/M           | NNNNNN      | ATTAACCCTCACTAAAGGGA                                          | CGGCCATGGACTGGTTCATRGCCGTCTGTTATGCCTTTGTATTTTC  |
| Gria2        | Q/R; Q/Q      | NNNNNN      | ATTAACCCTCACTAAAGGGA                                          | ATAGTCTCTGGTTTTCTTGGGTGCCTTTATGCRGCARRGGATGCGA  |
| Gria2 (flip) | R/G           | NNNNNN      | ATTAACCCTCACTAAAGGGA                                          | CCACACCTAAAGGATCCTCATTARGAACCCAGTAAATCTTGCAGT   |
| Gria2 (flop) | R/G           | NNNNNN      | ATTAACCCTCACTAAAGGGA                                          | CCACACCTAAAGGATCCTCATTARGAAATGCTGTTAACCTCGCAGT  |
| Gria4 (flip) | R/G           | NNNNNN      | ATTAACCCTCACTAAAGGGA                                          | CCACACCTAAAGGATCCTCATTARGAAATGCTGTTAACCTCGCAGT  |
| Gria4 (flop) | R/G           | NNNNNN      | ATTAACCCTCACTAAAGGGA                                          | CCACACCTAAAGGATCCTCATTARGAAATGCTGTTAACCTCGCAGT  |
| Grik1        | Q/R           | NNNNNN      | ATTAACCCTCACTAAAGGGA                                          | TTCTGGTTTGGCGTTGGAGCTCTCATGCRGCAAGGATCGGAGCTGA  |
| Grik2        | Q/R           | NNNNNN      | ATTAACCCTCACTAAAGGGA                                          | TTCTGGTTTGGAGTTGGAGCTCTCATGCRGCAAGGTTCTGAGCTCA  |
| Htr2c        | A; B; E; C; D | NNNNNN      | ATTAACCCTCACTAAAGGGA                                          | GCTGGACCGGTATGTAGCARTRCGTRRTCCTRTTGTAGCATAGCCGG |
| Igfbp7       | R/G           | NNNNNN      | ATTAACCCTCACTAAAGGGA                                          | GTGAAGAGCCGCAAGAGCGGARGGGTAAAGCCGGGGCAGCAGCCG   |
| Kcna1        | I/V           | NNNNNN      | ATTAACCCTCACTAAAGGGA                                          | TGTGTGCCATCGCTGGTGTGCTGACARRTTGCCCTGCCGTACCTGT  |

**Supplementary Table 4. Reference sequences for analysis of high-throughput sequencing data.** The expected DNA sequence for RT-PCR amplicons subjected to high-throughput sequence analysis is shown along with the relative position of the 6-nucleotide barcode (NNNNN) and the T3 RNA polymerase promoter. Editing sites are named according to the amino acid encoded by non-edited and edited transcripts, respectively, and their positions are indicated by an **R** (purine), corresponding to adenosine or guanosine moieties in cDNAs derived from non-edited and edited RNAs.
